# Supplementary material
Source: PubMed Central journal article supplement (PMC6646126)

# Supporting Information

## Highly Potent 2-Oxoester Inhibitors of Cytosolic Phospholipase A<sub>2</sub> (GIVA cPLA<sub>2</sub>)

*Anastasia Psarra,<sup>†</sup> Maroula G. Kokotou,<sup>†</sup> Gerasimia Galiatsatou,<sup>†</sup> Varnavas D. Mouchlis,<sup>‡</sup>  
Edward A. Dennis,<sup>\*,‡</sup> and George Kokotos<sup>\*,†</sup>*

<sup>†</sup>*Department of Chemistry, National and Kapodistrian University of Athens, Panepistimiopolis, Athens  
15771, Greece*

<sup>‡</sup>*Department of Pharmacology and Department of Chemistry and Biochemistry, School of Medicine,  
University of California San Diego, La Jolla, CA 92093-0601, USA*

\*To whom correspondence should be addressed. For G.K.: phone: +30 210 7274462; fax: +30 210 7274761; E-mail: [gkokotos@chem.uoa.gr](mailto:gkokotos@chem.uoa.gr). \*For E.A.D.: E-mail: [edennis@ucsd.edu](mailto:edennis@ucsd.edu)

### Contents

- S2 Figure S1. HRMS spectrum of inhibitor **25a** (GK504).
- S2 Figure S2. HRMS spectrum of inhibitor **27a** (GK505).

**Figure S1.** HRMS spectrum of inhibitor **25a** (GK504).

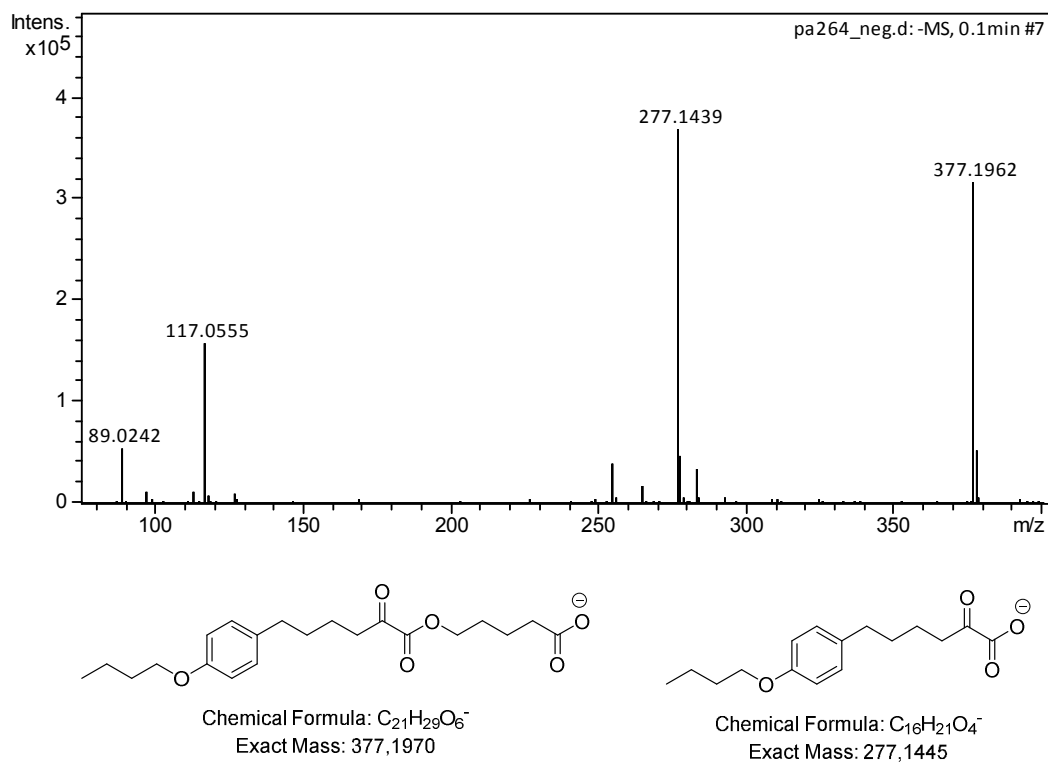

**Figure S2.** HRMS spectrum of inhibitor **27a** (GK505).

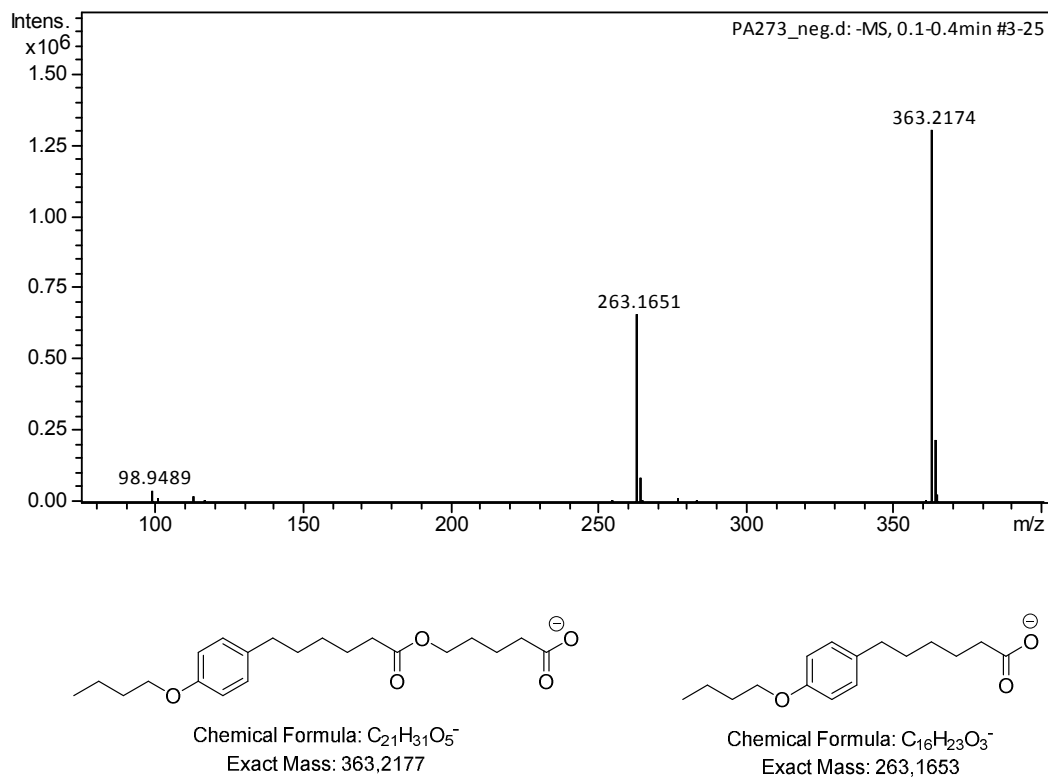

Supplement: ao8b01214_si_001.pdf [file ao8b01214_si_001.pdf]
